# Supplementary material
Source: HighWire-hosted journal article supplement (http://www.jrheum.org/highwire/filestream/29789/field_highwire_adjunct_files/0/141605DataSuppl.pdf)
Supplement: 141605DataSuppl.pdf [file 141605DataSuppl.pdf]

PANEL 1

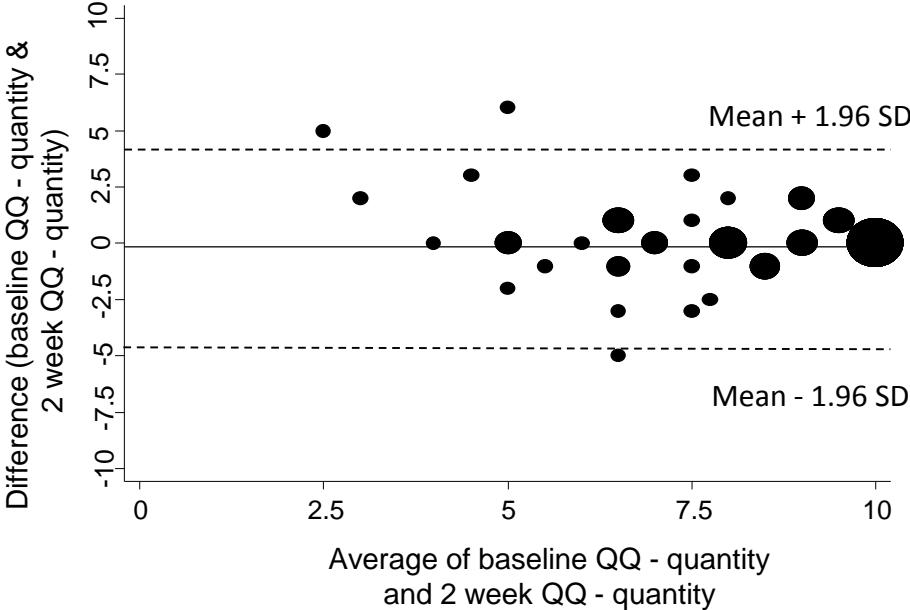

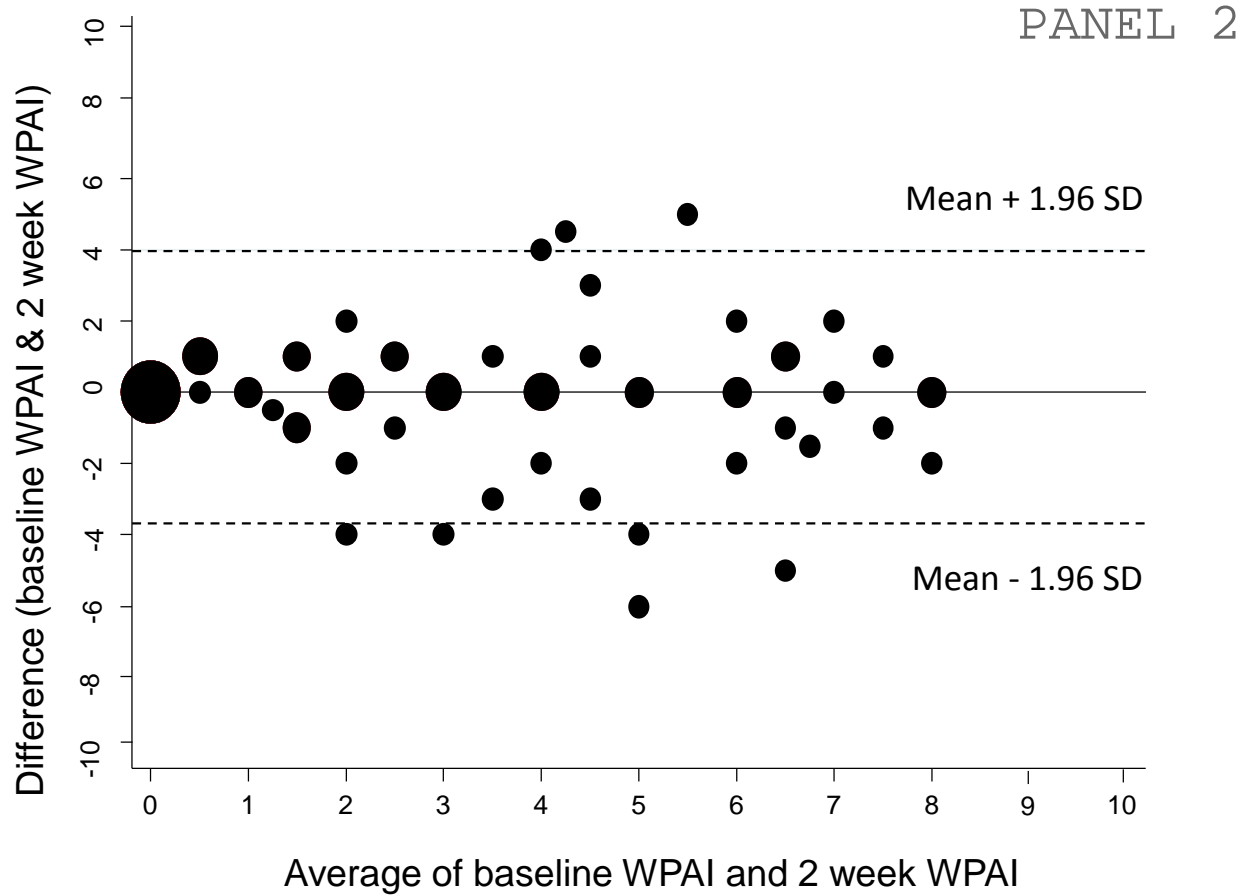

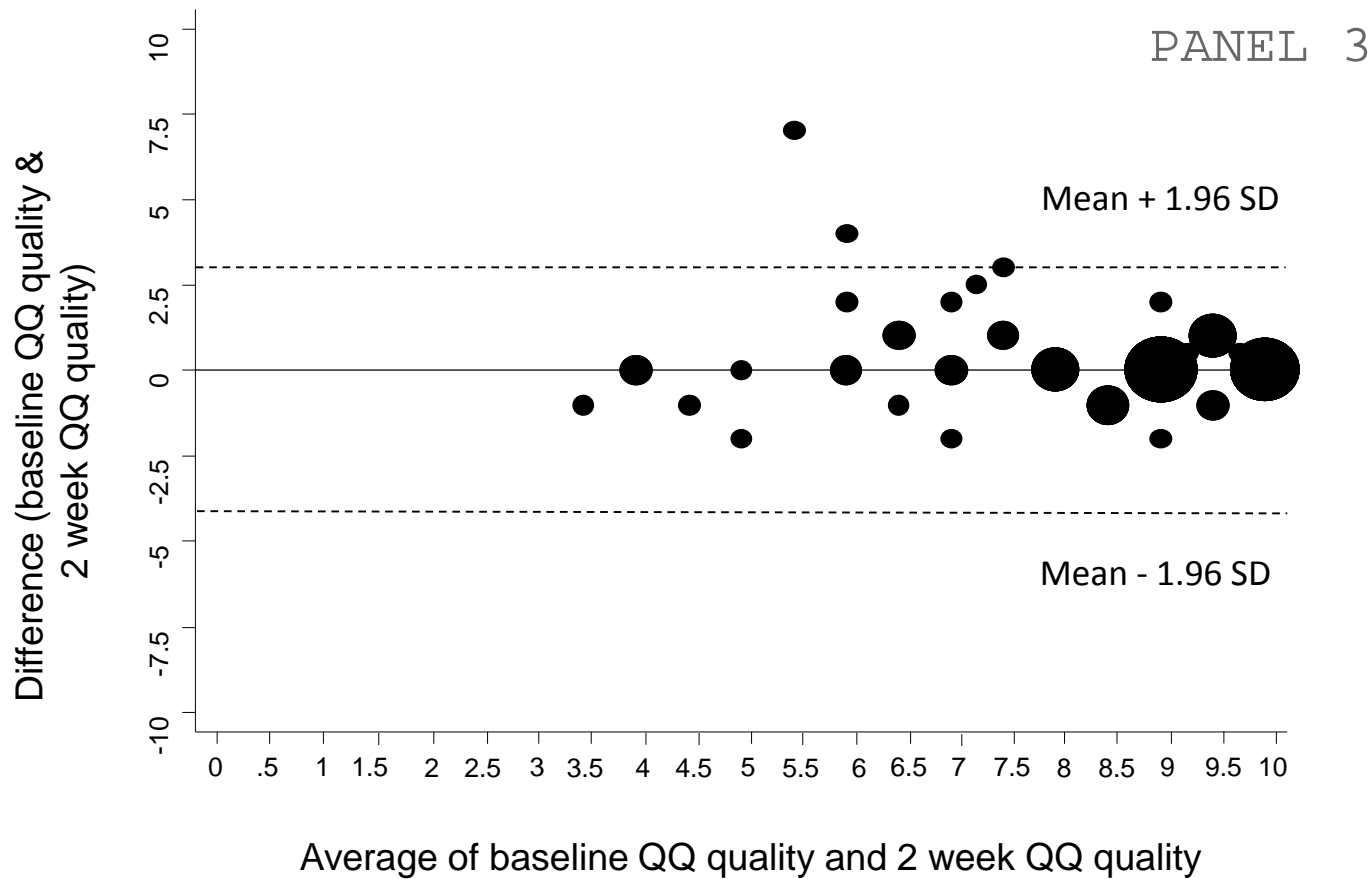

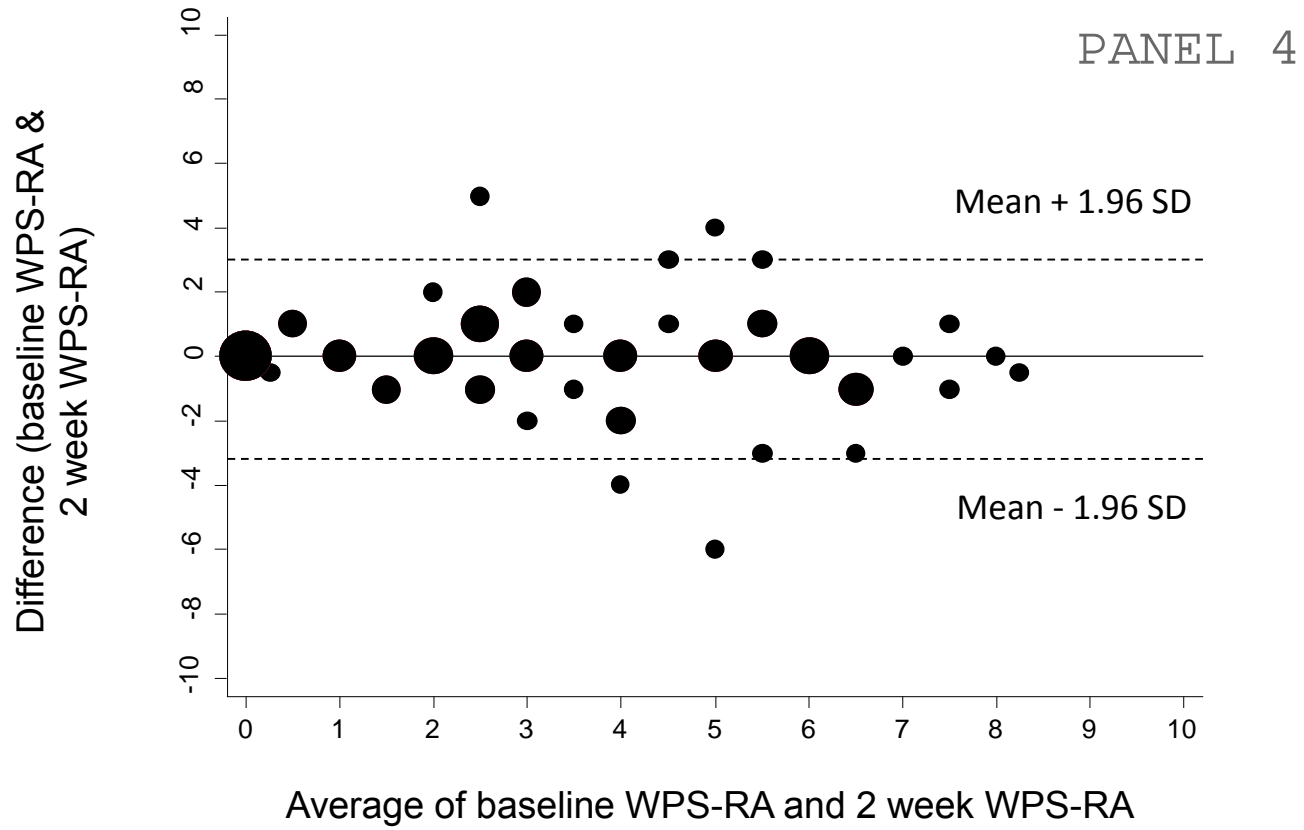

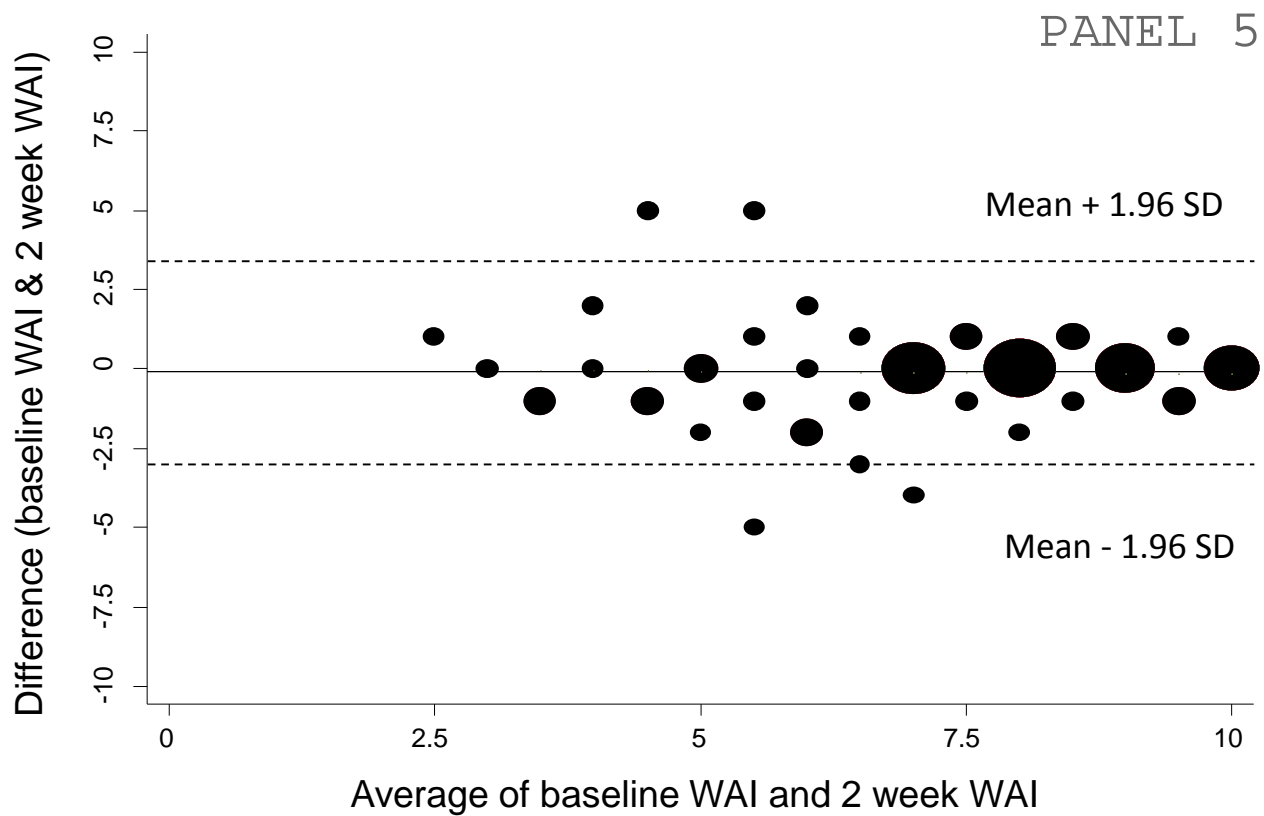

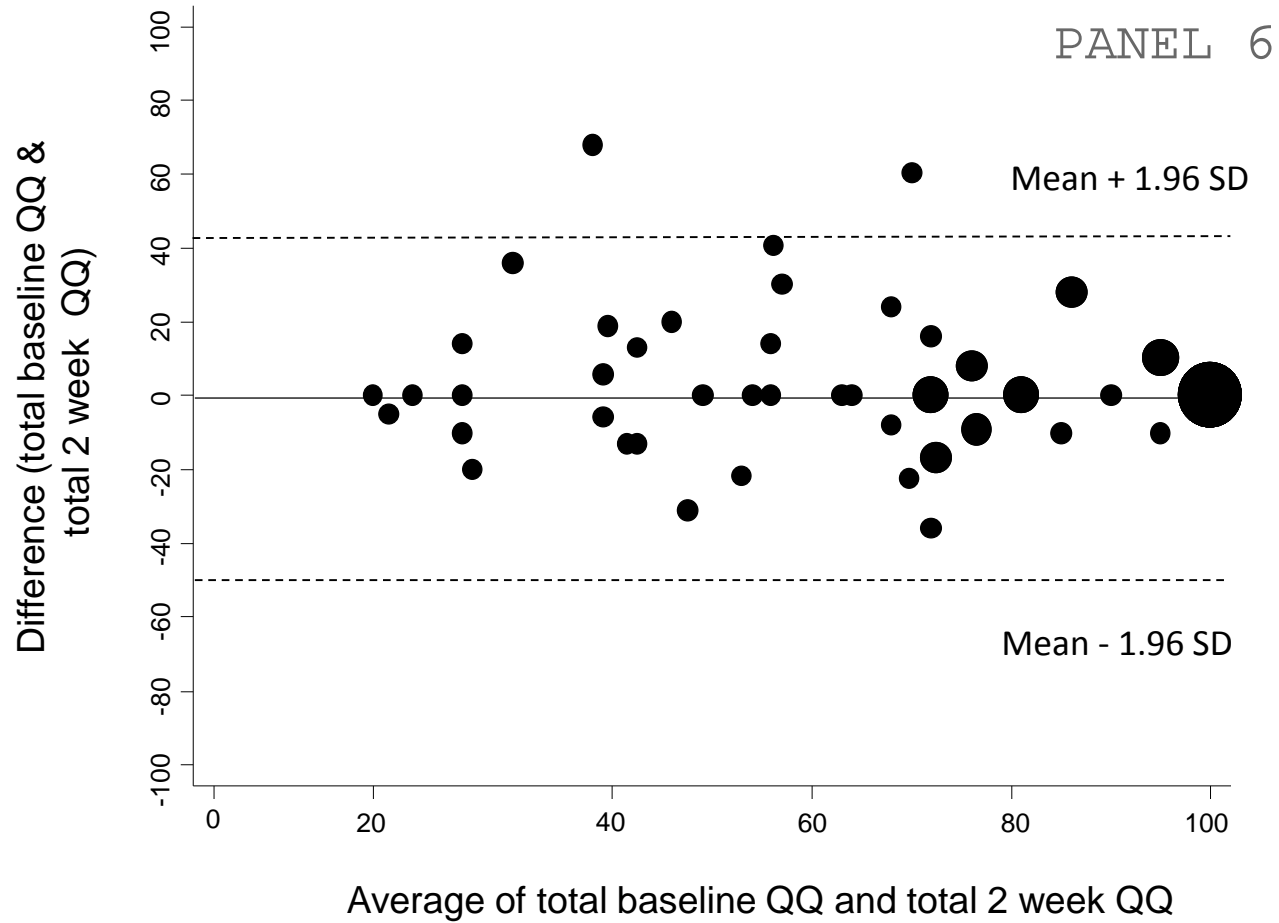

PANEL 7

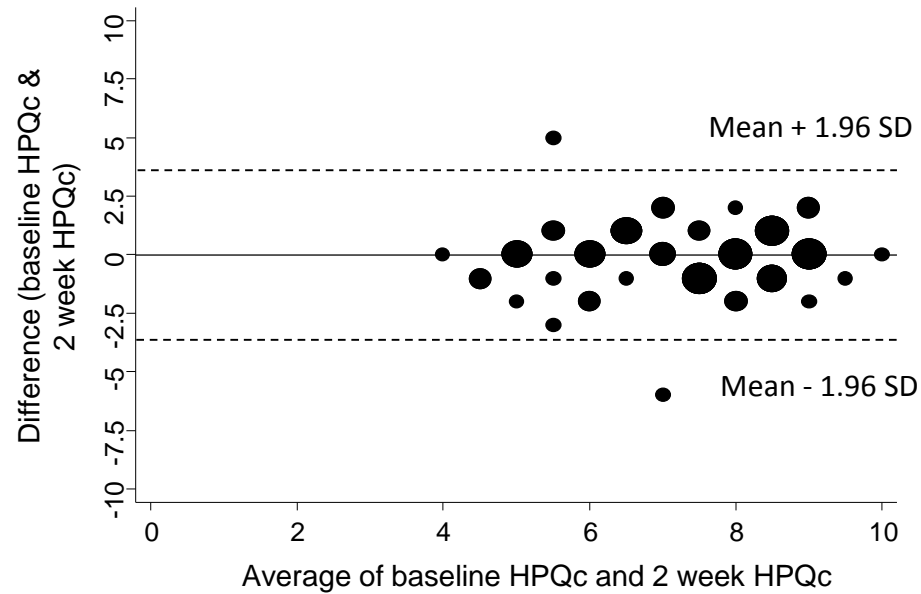

Figure 1. Bland-Altman plots of the difference (baseline and 2 week time points) against the mean of baseline and 2 weeks for each measure. Solid horizontal lines are the mean differences and dashed horizontal lines are the 95% limits of agreement. The dot size varies by the amount of data points, the larger the dot size, the more data points.
